# Supplementary material for: Novel isomorphism of two hexagonal non-centrosymmetric hybrid crystals of M(en)3Ag2I4 (M = transition metal Mn2+ or main-group metal Mg2+; en = ethylenediamine)
Source: Royal Society of Chemistry journal article supplement (doi:10.1039/c7ce02005h), 2017-12-08
Supplement: c7ce02005h1.pdf [file c7ce02005h1.pdf]

**Novel isomorphism of two hexagonal non-centrosymmetric hybrid crystals of  $M(en)_3Ag_2I_4$  ( $M =$  transition metal  $Mn^{2+}$  or main-group metal  $Mg^{2+}$ ; en = ethylenediamine)**

Xin Chen,<sup>a</sup> Zhi-Yuan Yao,<sup>a</sup> Chen Xue,<sup>a</sup> Zhu-Xi Yang,<sup>a</sup> Jian-Lan Liu<sup>a</sup> and Xiao-Ming Ren<sup>\*a,b,c</sup>

<sup>a</sup>State Key Laboratory of Materials-Oriented Chemical Engineering and College of Chemistry & Molecular Engineering, Nanjing Tech University, Nanjing 210009, P. R. China

<sup>b</sup>College of Materials Science and Engineering, Nanjing Tech University, Nanjing 210009, P. R. China

<sup>c</sup>State Key Laboratory of Coordination Chemistry, Nanjing University 210093, P. R. China

Tel.: +86 25 58139476

Fax: +86 25 58139481

Email: [xmren@njtech.edu.cn](mailto:xmren@njtech.edu.cn)

## Contents

Fig. S1 (a, b) Photos of crystals of **2** (c) An asymmetric unit in **2** with non-hydrogen atom labeling, where the ellipsoids are drawn at the 50% probability level (d)  $\text{Mg}(\text{en})_3^{2+}$  coordination polyhedron with the symmetry of  $D_3$  point group.

Fig. S2 Packing diagrams, which shows hexagonal channels built from  $\text{AgI}_4$  tetrahedra and  $\text{Mn}(\text{en})_3^{2+}$  polyhedra residual in the channels viewed along (a)  $c$ -axis (b)  $a$ -axis directions in **2**.

Fig. S3 (a) Experimental and simulated PXRD patterns and (b) TG plot of **2**.

Fig. S4 IR spectra of **1** and **2**.

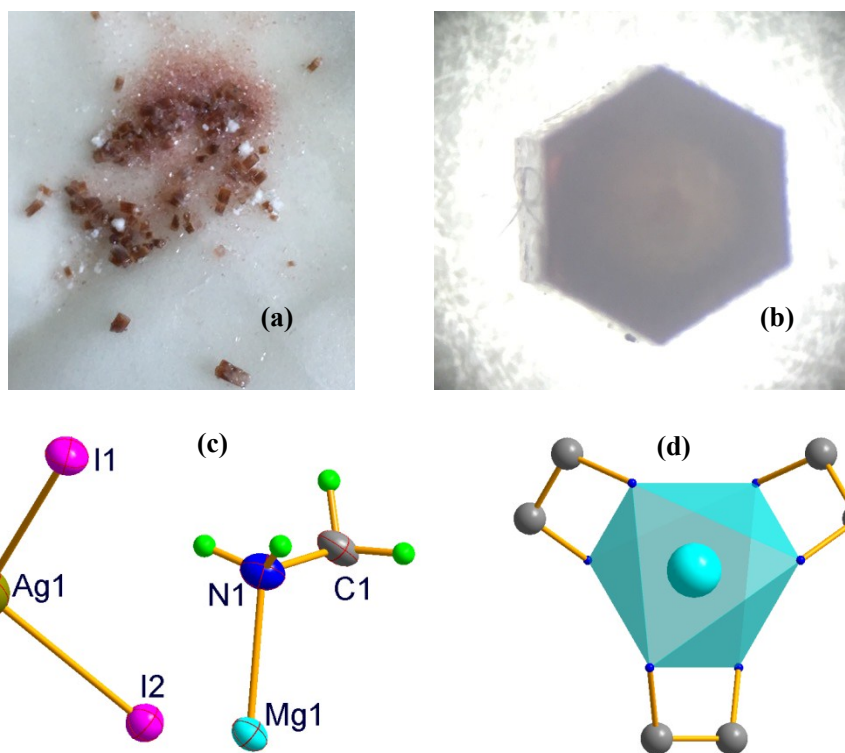

Fig. S1 (a, b) Photos of crystals of **2** (c) An asymmetric unit in **2** with non-hydrogen atom labeling, where the ellipsoids are drawn at the 50% probability level (d)  $\text{Mg}(\text{en})_3^{2+}$  coordination polyhedron with the symmetry of  $D_3$  point group.

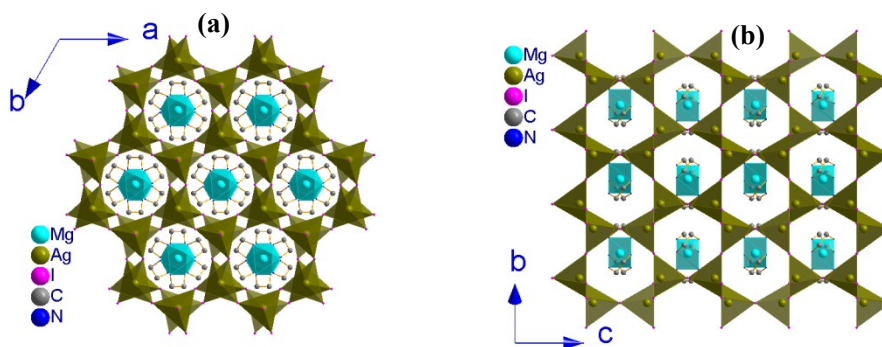

Fig. S2 Packing diagrams, which shows hexagonal channels built from  $\text{AgI}_4$  tetrahedra and  $\text{Mn}(\text{en})_3^{2+}$  polyhedra residual in the channels viewed along (a)  $c$ -axis (b)  $a$ -axis directions in **2**.

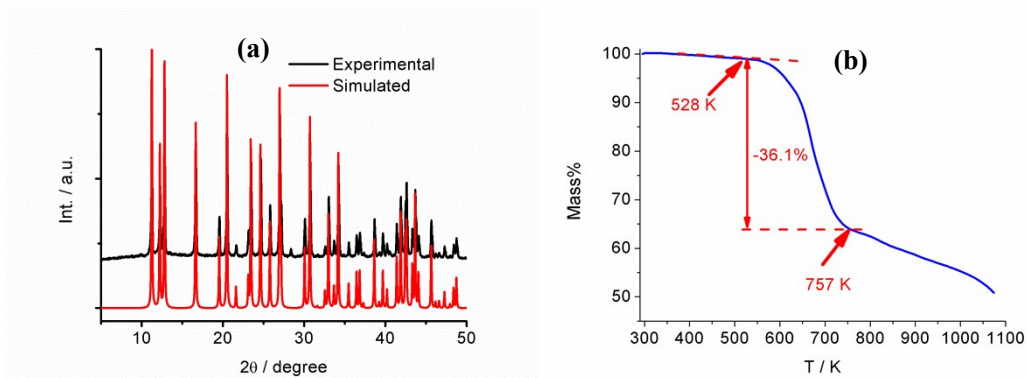

Fig. S3 (a) Experimental and simulated PXRD patterns and (b) TG plot of **2**.

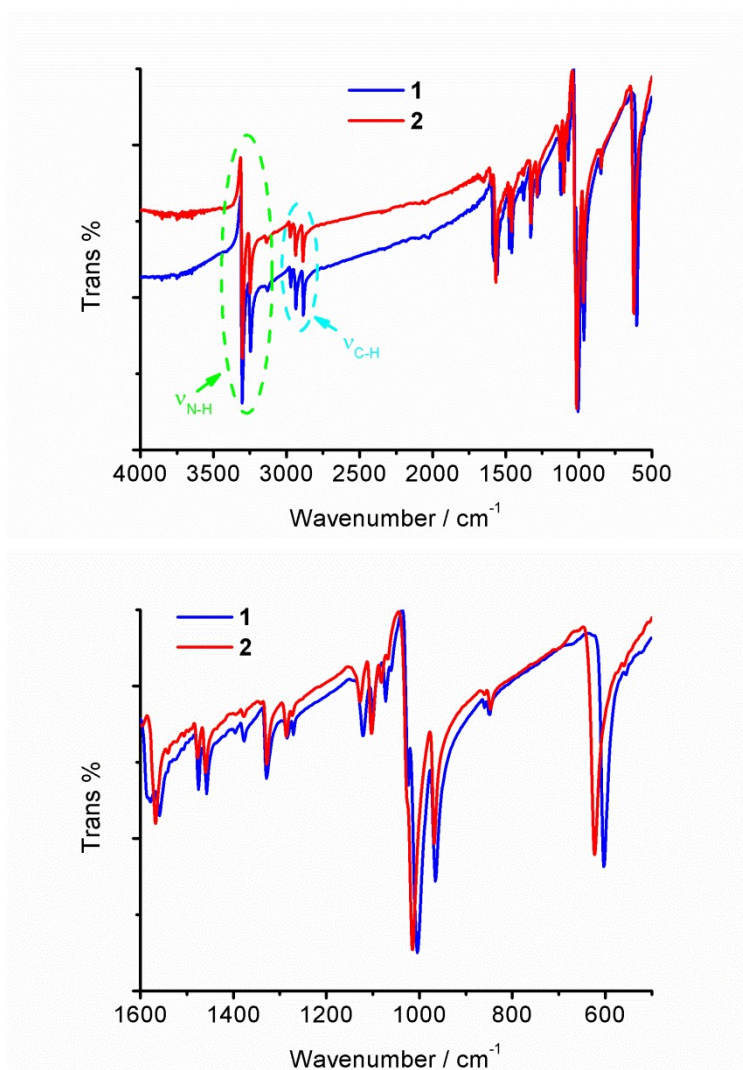

Fig. S4 IR spectra of **1** and **2**.
